# Supplementary material for: Supramolecular synthon polymorphism in 2 : 1 co-crystal of 4-hydroxybenzoic acid and 2,3,5,6-tetramethylpyrazine
Source: Royal Society of Chemistry journal article supplement (doi:10.1039/b700082k), 2007-01-01
Supplement: b700082k.pdf [file b700082k.pdf]

## Supramolecular synthon polymorphism in 2:1 co-crystal of 4-hydroxybenzoic acid and 2,3,5,6-tetramethylpyrazine

B. R. Sreekanth,<sup>a</sup> Peddy Vishweshwar<sup>\*a</sup> and K. Vyas<sup>\*a</sup>

<sup>a</sup>Department of Analytical Research, Discovery Research, Dr. Reddy's Laboratories Ltd.,  
Miyapur, Hyderabad, 500 049, India. Fax: 91 040 23045440; Tel: 91 040 23045439  
E-mail: vishweshwarp@drreddys.com; vyask@drreddys.com

### Supplementary Information

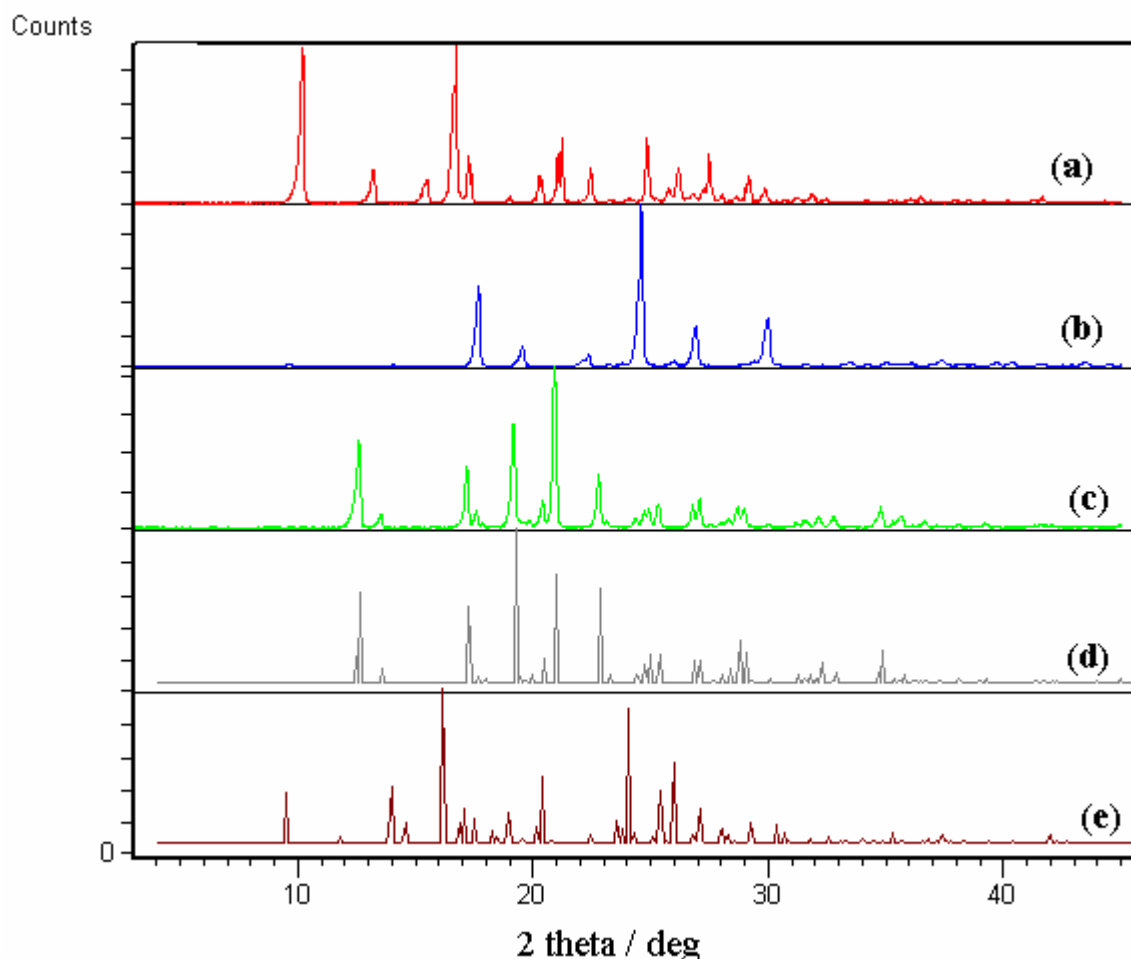

**Figure 1.** Experimental PXRD of TMP (a); 4HBA (b) and (4HBA)<sub>2</sub>•(TMP) co-crystal form II (c). Calculated PXRD of form II (d) and form I (e). Notice that calculated form II PXRD matches with the bulk sample.

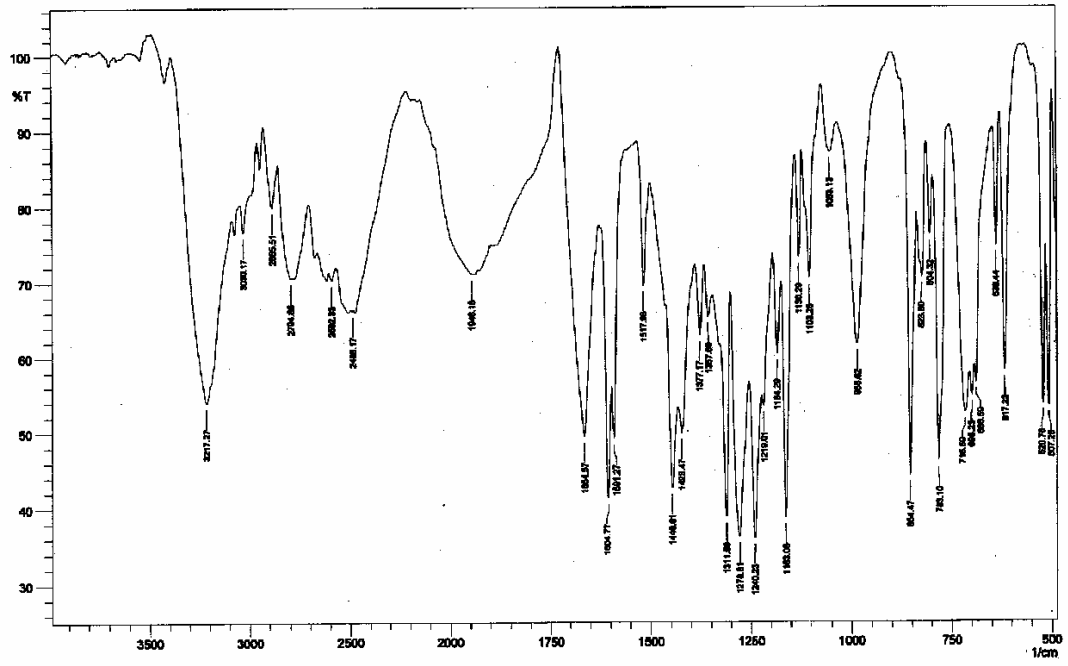

(a)

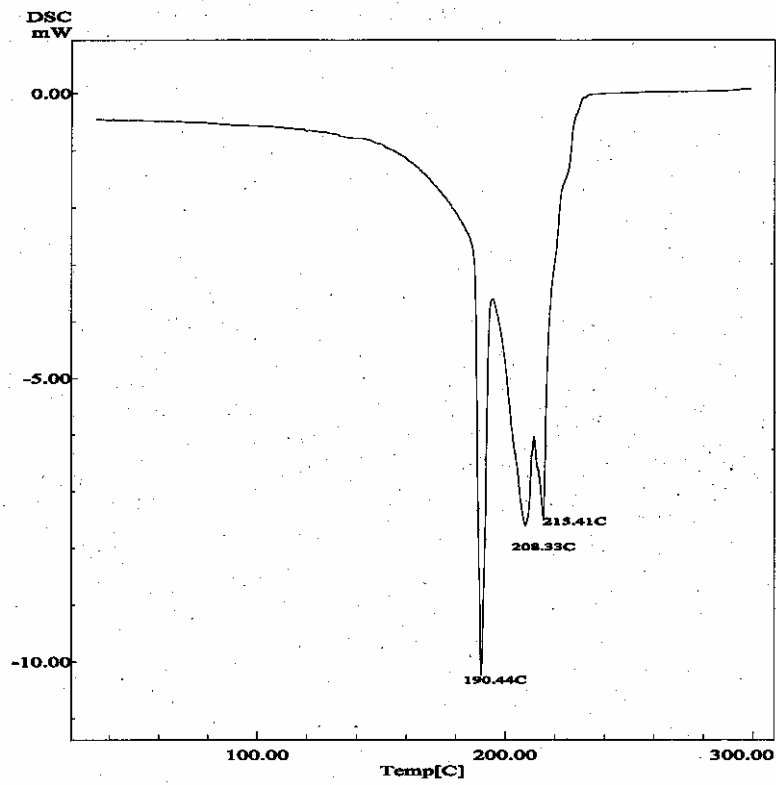

(b)

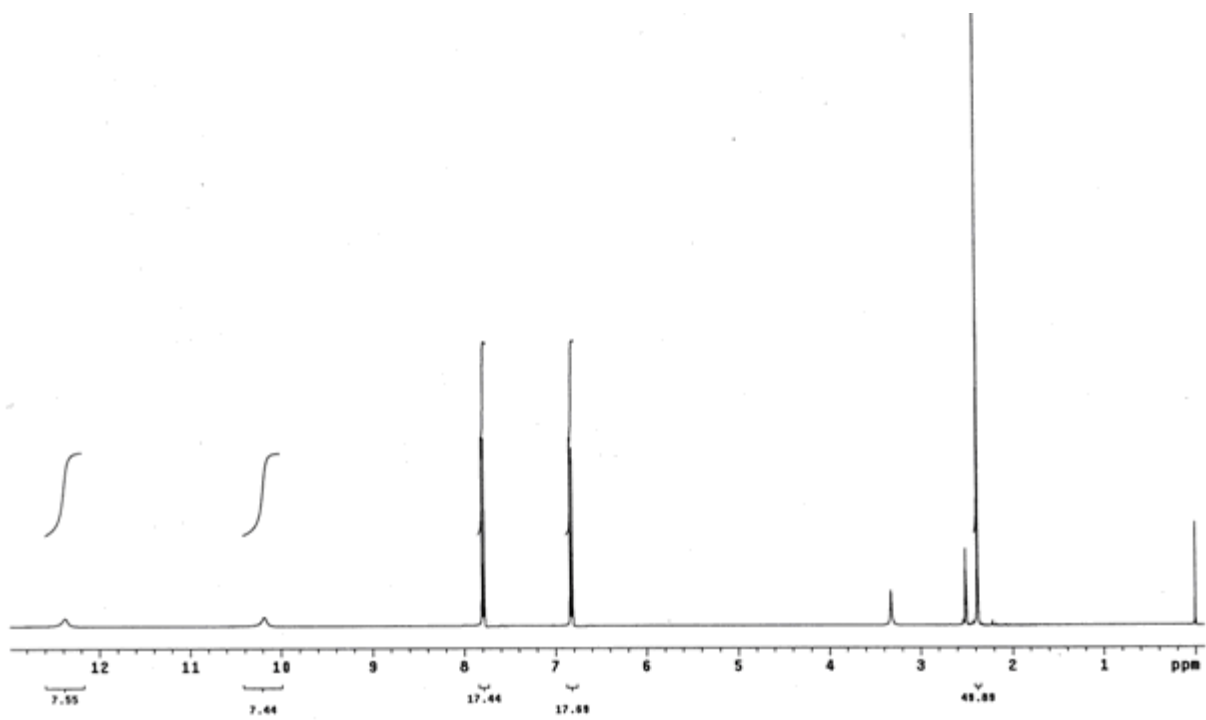

(c)

**Figure 2.** (a) FT-IR, (b) DSC and (c)  $^1\text{H-NMR}$  of  $(4\text{HBA})_2\cdot(\text{TMP})$  co-crystal form II.
